# Supplementary material for: Altered peripheral immune profiles in treatment-resistant depression: response to ketamine and prediction of treatment outcome
Source: PubMed Central journal article supplement (PMC5416674; doi:10.1038/tp.2017.31), 2017-03-21
Supplement: tp201731x1.pdf [file tp201731x1.pdf]

|            | Plate 1        |        |               |               | Plate 2        |        |       |       | Plate 3        |       |       |       |
|------------|----------------|--------|---------------|---------------|----------------|--------|-------|-------|----------------|-------|-------|-------|
|            | R <sup>2</sup> | CV     | MinDC (pg/ml) | MaxDC (pg/ml) | R <sup>2</sup> | CV     | MinDC | MaxDC | R <sup>2</sup> | CV    | MinDC | MaxDC |
| EGF        | 1              | 1.08%  | 3.32          | 15524         | 1              | 1.20%  | 2.04  | 16284 | 1              | 1.06% | 3.53  | 16223 |
| EOTAXIN    | 0.999          | 2.04%  | 3.21          | 15884         | 1              | 1.80%  | 2.61  | 17050 | 1              | 1.89% | 3.31  | 17709 |
| FGF-2      | 1              | 1.03%  | 3.84          | 10521         | 0.999          | 2.35%  | 2.98  | 10182 | 0.999          | 1.50% | 2.95  | 15239 |
| FLT-3L     | 1              | 0.80%  | 3.58          | 16179         | 1              | 0.44%  | 3.18  | 16460 | 1              | 0.11% | 1.78  | 20738 |
| Fractakine | 1              | 0.74%  | 3.29          | 20351         | 0.999          | 3.30%  | 2.63  | 10085 | 0.999          | 2.62% | 2.19  | 11777 |
| G-CSF      | 1              | 0.35%  | 2.76          | 16548         | 1              | 0.37%  | 2.75  | 16643 | 1              | 0.51% | 2.8   | 18633 |
| GM-CSF     | 1              | 1.14%  | 2.95          | 17198         | 1              | 0.65%  | 2.7   | 18241 | 1              | 0.53% | 2.84  | 12108 |
| GRO        | 1              | 0.40%  | 2.74          | 15070         | 1              | 0.82%  | 1.99  | 14355 | 1              | 0.54% | 3.35  | 14850 |
| IFNa2      | 1              | 0.81%  | 3.38          | 16520         | 1              | 0.031% | 4.9   | 11515 | 1              | 1.48% | 2.85  | 12930 |
| IFNr       | 1              | 1.32%  | 2.73          | 18213         | 1              | 0.89%  | 2.57  | 18532 | 1              | 0.77% | 2.68  | 17019 |
| IL-10      | 0.999          | 1.84%  | 2.39          | 14980         | 1              | 0.88%  | 1.98  | 13173 | 1              | 0.72% | 2.91  | 9557  |
| IL-12P40   | 1              | 0.66%  | 3.22          | 15931         | 1              | 0.15%  | 1.89  | 14583 | 1              | 0.14% | 1.28  | 19088 |
| IL-12P70   | 1              | 1.52%  | 2.68          | 12790         | 1              | 0.79%  | 3     | 12575 | 1              | 1.44% | 2.64  | 13910 |
| IL-13      | 1              | 1.48%  | 2.83          | 16413         | 1              | 0.87%  | 2.74  | 11982 | 1              | 0.44% | 2.96  | 13687 |
| IL-15      | 1              | 1.12%  | 2.43          | 15987         | 1              | 0.39%  | 1.31  | 18473 | 1              | 0.50% | 2.03  | 20038 |
| IL-17A     | 1              | 1.65%  | 2.86          | 18417         | 1              | 1.00%  | 1.83  | 15481 | 1              | 0.75% | 2.9   | 18969 |
| IL-1a      | 1              | 0.49%  | 2.56          | 9945          | 0.999          | 1.02%  | 2.1   | 9811  | 0.999          | 2.28% | 2.43  | 12389 |
| IL-1b      | 1              | 1.57%  | 2.95          | 14692         | 1              | 1.62%  | 1.95  | 16391 | 1              | 1.39% | 1.19  | 11942 |
| IL-1RA     | 1              | 0.74%  | 2.87          | 16976         | 1              | 0.66%  | 2.14  | 17191 | 1              | 0.51% | 2.65  | 15904 |
| IL-2       | 1              | 1.01%  | 2.81          | 17867         | 1              | 0.43%  | 1.94  | 18475 | 1              | 0.58% | 2.4   | 17502 |
| IL-3       | 1              | 0.24%  | 1.53          | 29466         | 1              | 1.21%  | 2.45  | 18794 | 1              | 1.56% | 2.07  | 11779 |
| IL-4       | 1              | 1.54%  | 2.65          | 16737         | 1              | 1.49%  | 2.31  | 16213 | 1              | 0.95% | 2.76  | 14522 |
| IL-5       | 0.999          | 1.69%  | 3.07          | 20015         | 1              | 1.24%  | 2.14  | 8525  | 1              | 0.87% | 2.95  | 11870 |
| IL-6       | 1              | 0.077% | 0.028         | 14664         | 0.999          | 2.94%  | 1.39  | 14168 | 0.999          | 2.59% | 1.78  | 11622 |
| IL-7       | 1              | 0.16%  | 2.1           | 11837         | 1              | 0.17%  | 3.99  | 11856 | 0.999          | 1.34% | 1.42  | 11897 |
| IL-8       | 1              | 1.13%  | 2.97          | 13012         | 1              | 1.28%  | 1.9   | 15181 | 1              | 0.32% | 3.02  | 14628 |
| IL-9       | 0.999          | 1.89%  | 2.81          | 18189         | 1              | 1.24%  | 3     | 12071 | 1              | 0.17% | 0.98  | 20593 |
| IP-10      | 0.999          | 0.054% | 4.19          | 11275         | 1              | 1.39%  | 1.89  | 17752 | 0.999          | 1.09% | 2.82  | 15360 |
| MCP-1      | 0.999          | 2.70%  | 3.36          | 12133         | 1              | 1.59%  | 3.11  | 14586 | 1              | 1.54% | 3.28  | 14520 |
| MCP-3      | 0.999          | 0.095% | 8.03          | 11683         | 0.999          | 2.84%  | 2.14  | 16871 | 1              | 0.28% | 3.18  | 14923 |
| MDC        | 1              | 0.034% | 4.36          | 10964         | 0.999          | 2.59%  | 2.31  | 10847 | 0.994          | 0.14% | 4.83  | 11673 |
| MIP-1a     | 1              | 0.62%  | 5.13          | 7359          | 0.993          | 7.09%  | 1.84  | 8412  | 0.994          | 0.40% | 5.21  | 10890 |
| MIP-1b     | 1              | 0.30%  | 1.9           | 21598         | 1              | 0.29%  | 1.8   | 18900 | 1              | 0.39% | 2.2   | 20577 |
| PDGF-AA    | 1              | 0.78%  | 3.27          | 17279         | 1              | 0.29%  | 1.8   | 20676 | 1              | 0.36% | 2.62  | 21051 |
| PDGF-BB    | 1              | 0.14%  | 3.71          | 14317         | 1              | 0.21%  | 1.97  | 16018 | 1              | 0.55% | 3.52  | 12793 |
| RANTES     | 0.999          | 0.37%  | 13.42         | 18862         | 0.999          | 0.37%  | 1.7   | 19560 | 0.999          | 1.18% | 3.04  | 14744 |
| sCD40L     | 1              | 1.43%  | 16            | 17680         | 1              | 1.62%  | 2.86  | 17935 | 1              | 0.11% | 0.7   | 42719 |
| TGF-a      | 1              | 0.11%  | 0.86          | 7394          | 1              | 0.67%  | 1.96  | 9374  | 0.998          | 0.92% | 4.34  | 11822 |
| TNFa       | 0.999          | 2.16%  | 2.92          | 17111         | 1              | 1.63%  | 1.76  | 12968 | 1              | 1.05% | 1.59  | 12016 |
| TNFb       | 1              | 0.22%  | 0.83          | 39684         | 1              | 0.12%  | 0.93  | 21271 | 1              | 0.34% | 2.54  | 21092 |
| VEGF       | 0.999          | 2.55%  | 2.01          | 12202         | 0.999          | 3.95%  | 3.14  | 14625 | 1              | 1.27% | 2.5   | 15062 |
